# Supplementary material
Source: HighWire-hosted journal article supplement (http://thorax.bmj.com/highwire/filestream/174076/field_highwire_adjunct_files/2/Figure_E3.pdf)

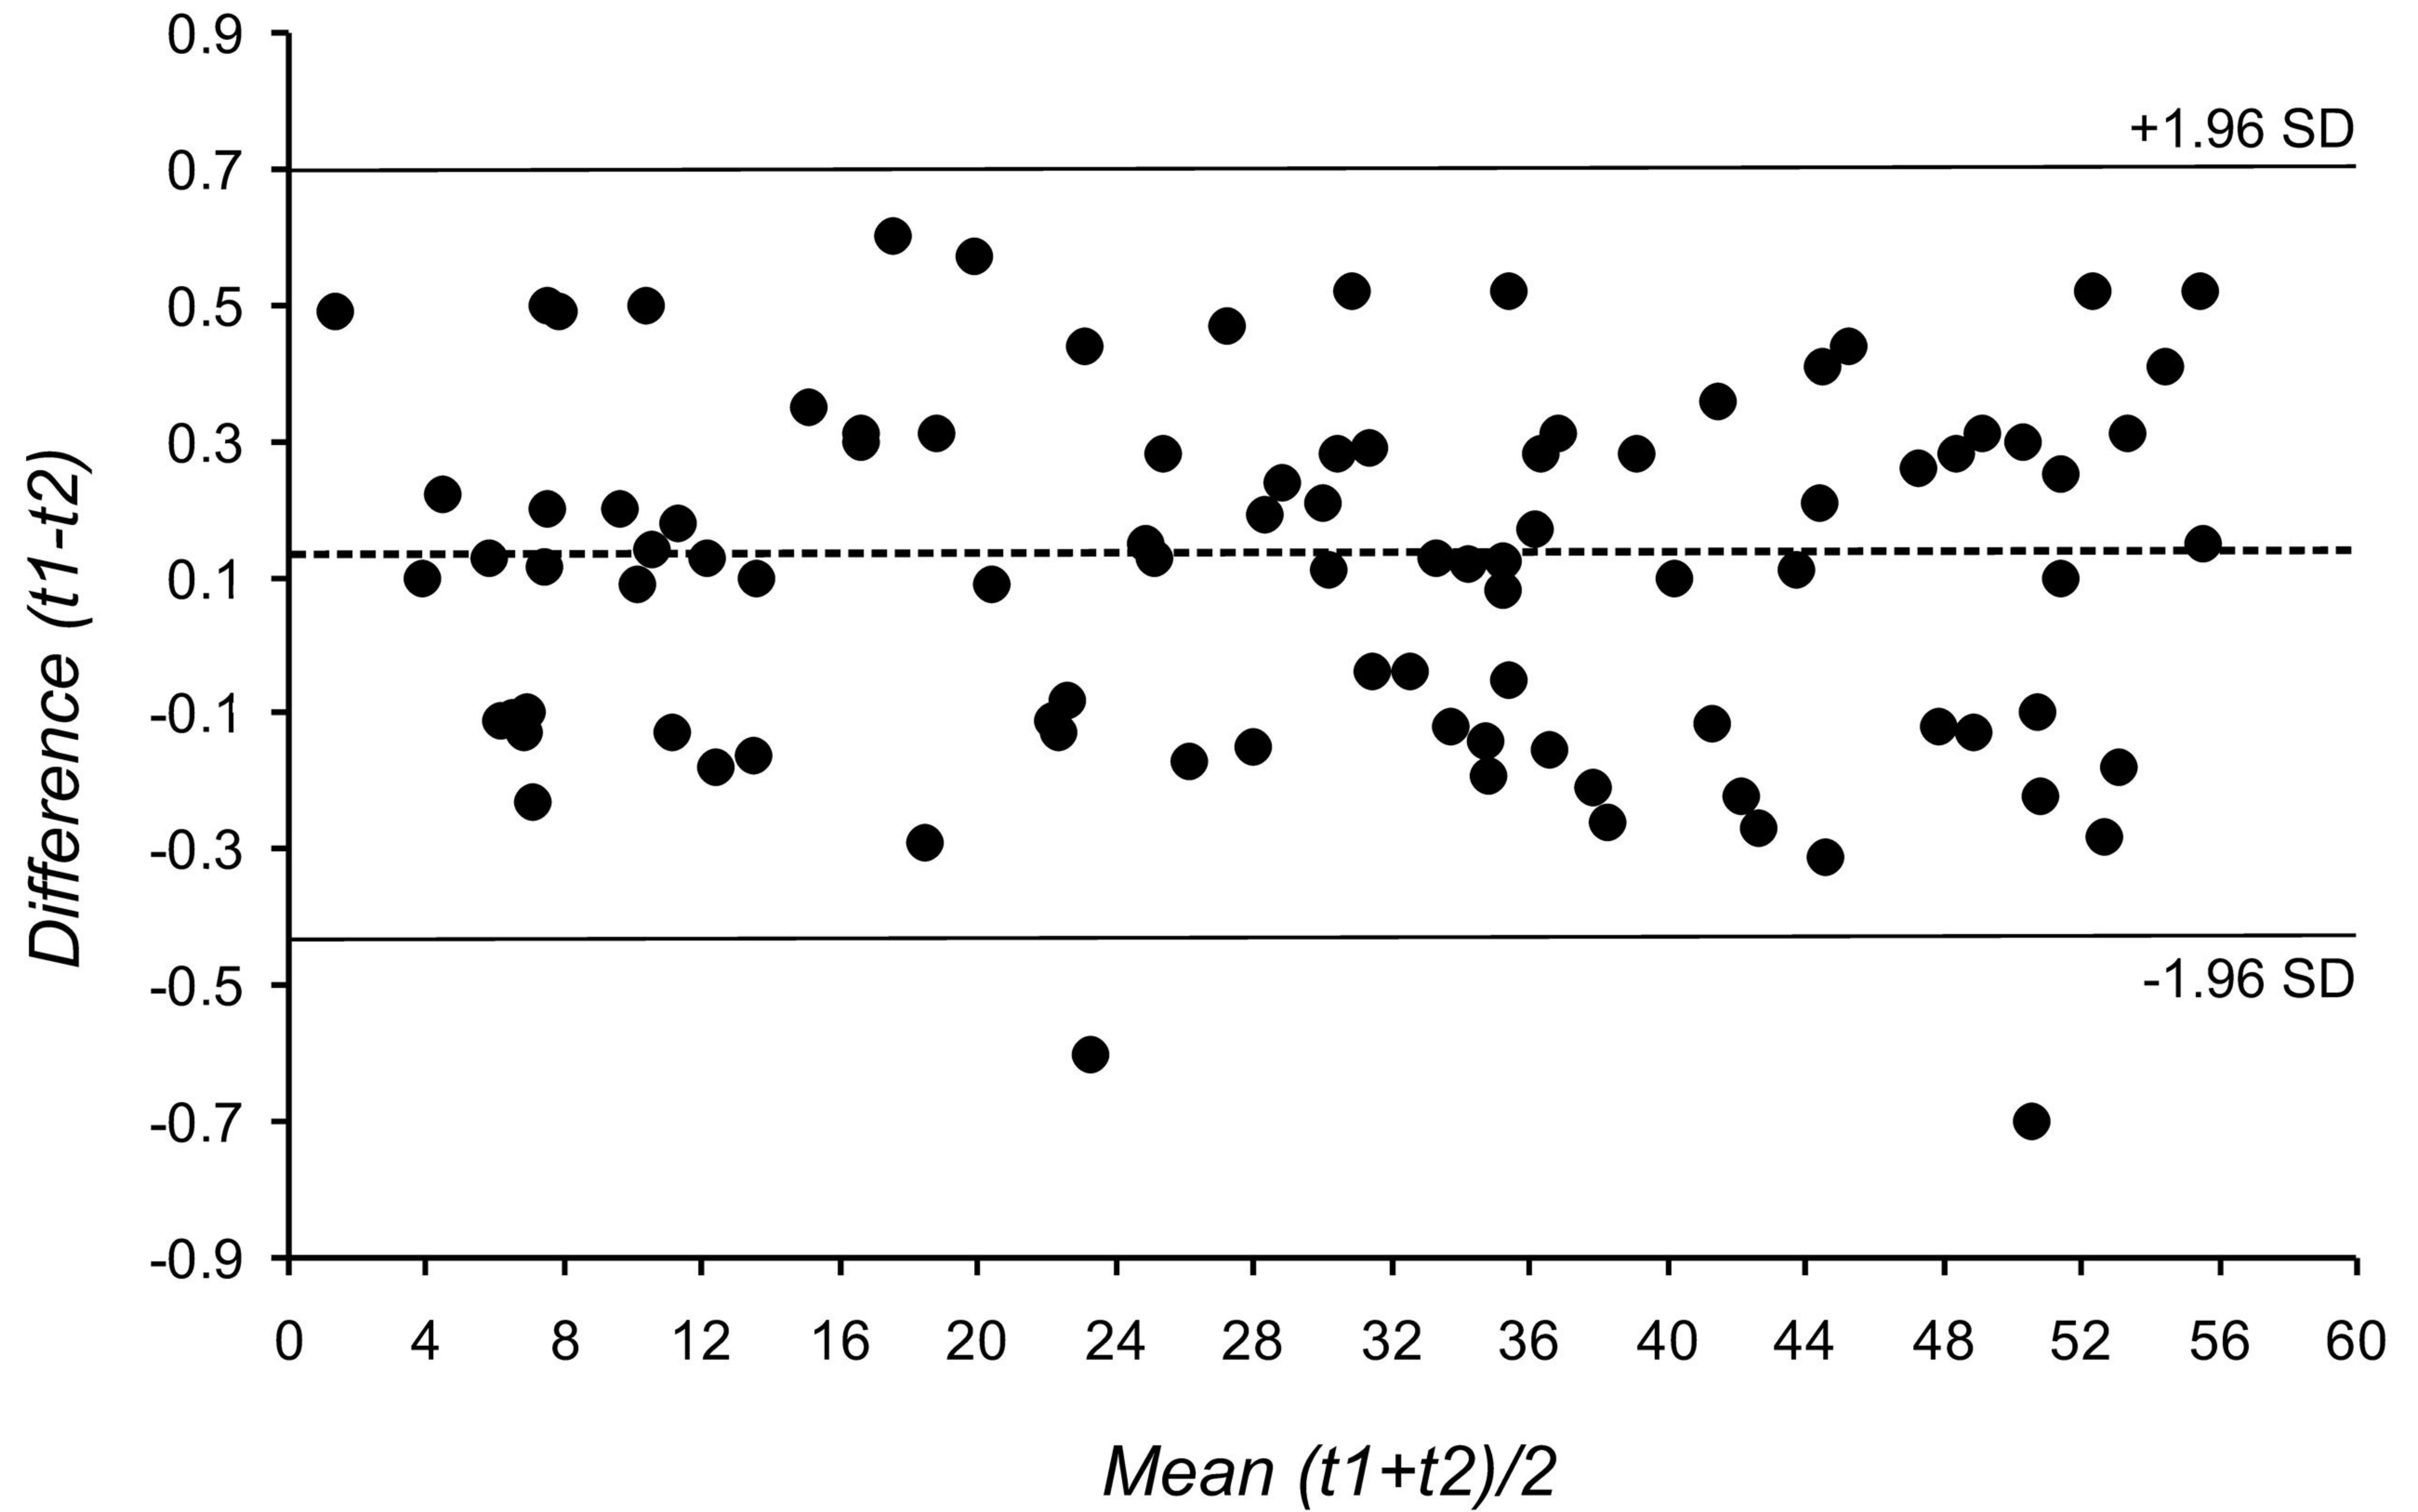

Supplement: Figure_E3.pdf [file Figure_E3.pdf]
